# Supplementary material
Source: PubMed Central journal article supplement (PMC3915502)
Supplement: NIHMS540327-supplement-1.pdf [file NIHMS540327-supplement-1.pdf]

# 50uM Melphalan 8226/dsRed2

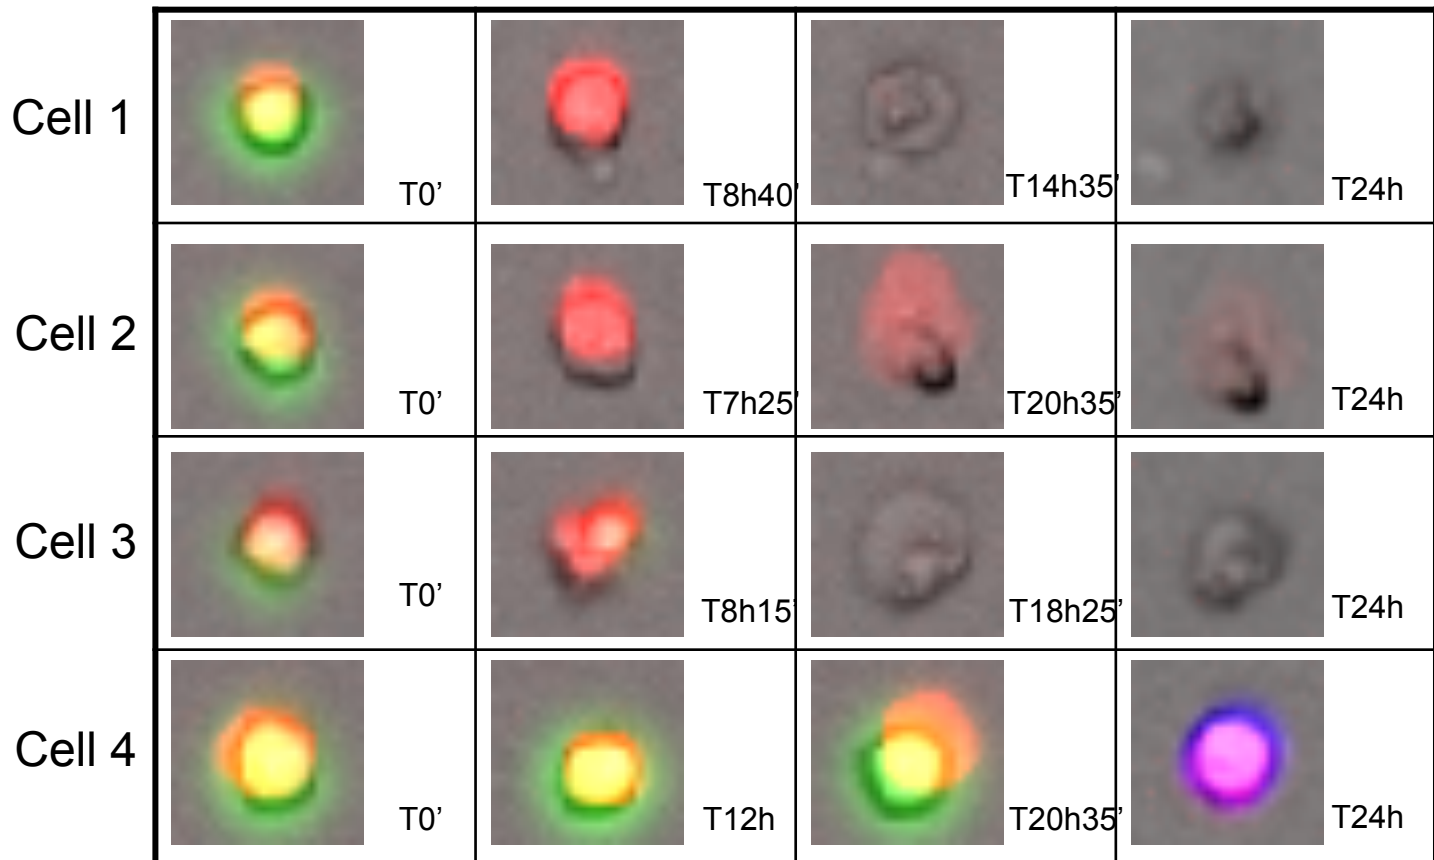

Motion Analysis (Green) + RFP (Red) + Bright Field

Calcein AM (Blue) +  
RFP (Red)+  
Bright Field  
Endpoint
