# Supplementary material
Source: PubMed Central journal article supplement (PMC3915502)
Supplement: NIHMS540327-supplement-2.pdf [file NIHMS540327-supplement-2.pdf]

# 50uM Melphalan NCI-H929

Live

Loss of Motion/Green

Appearance of Ethd-1

(if applicable)

Cell 1

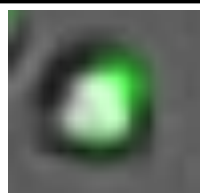

T0

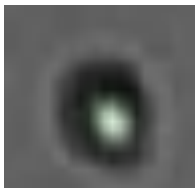

6H 15M

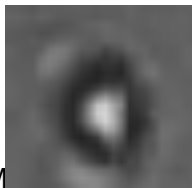

16H 40M

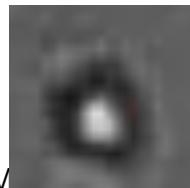

T24h

Cell 2

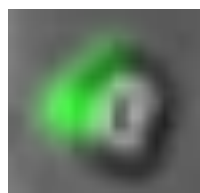

T0

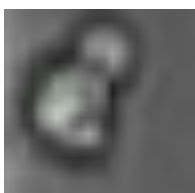

30M

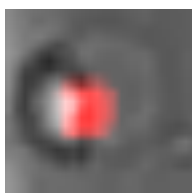

14H 35M

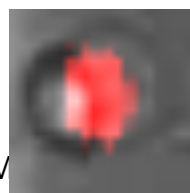

T24h

Cell 3

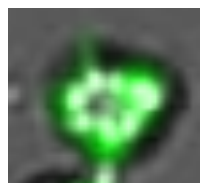

T0

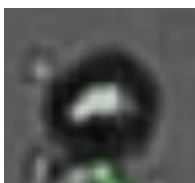

4H 35M

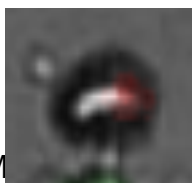

6H 15M

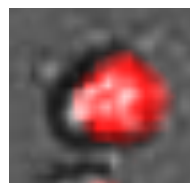

T24h

Cell 4

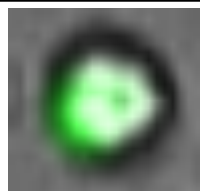

T0

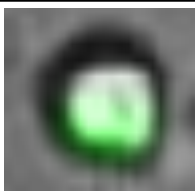

6H 15M

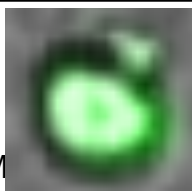

14H 35M

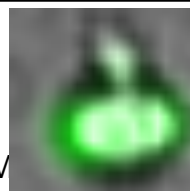

T24h

Movement Analysis (Green) + EthD-1 (Red) + Bright Field

Movement  
Analysis  
(Green) +  
EthD-1 (Red) +  
Bright Field  
Endpoint
