# Supplementary material
Source: PubMed Central journal article supplement (PMC3915502)

### 8226/LR5

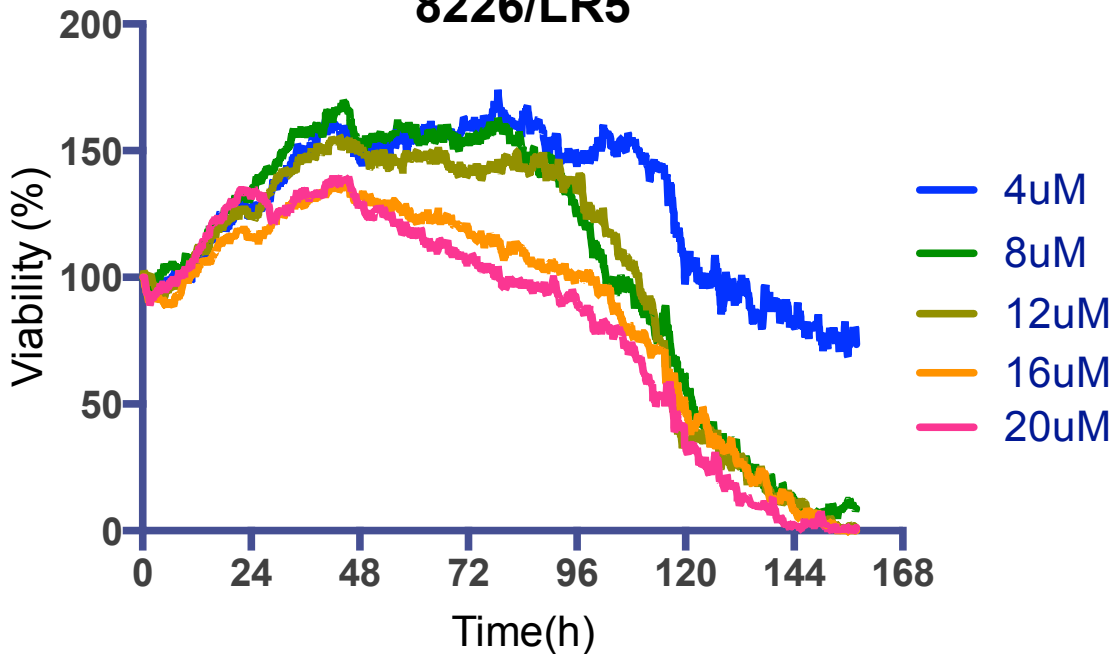

### NCI-H929

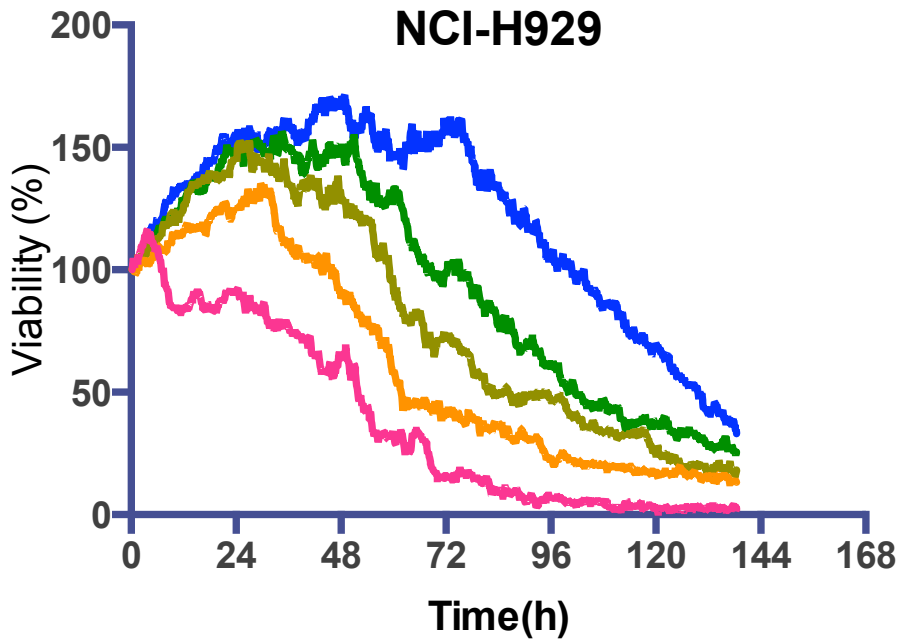

Supplement: NIHMS540327-supplement-3.pdf [file NIHMS540327-supplement-3.pdf]

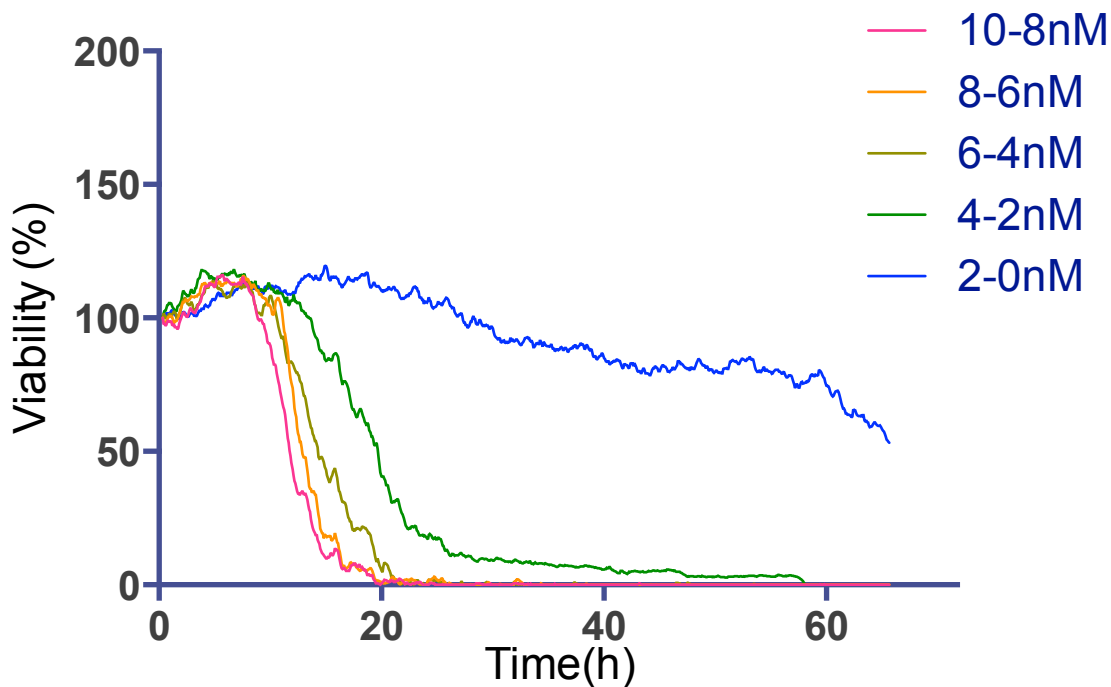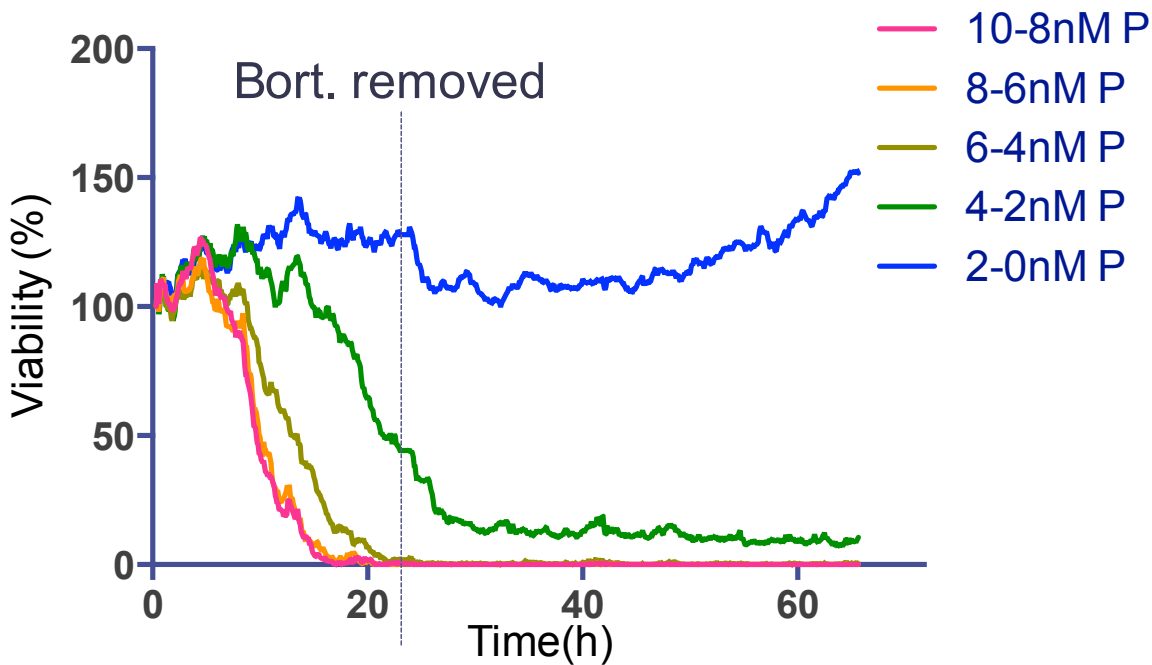

Supplement: NIHMS540327-supplement-4.pdf [file NIHMS540327-supplement-4.pdf]

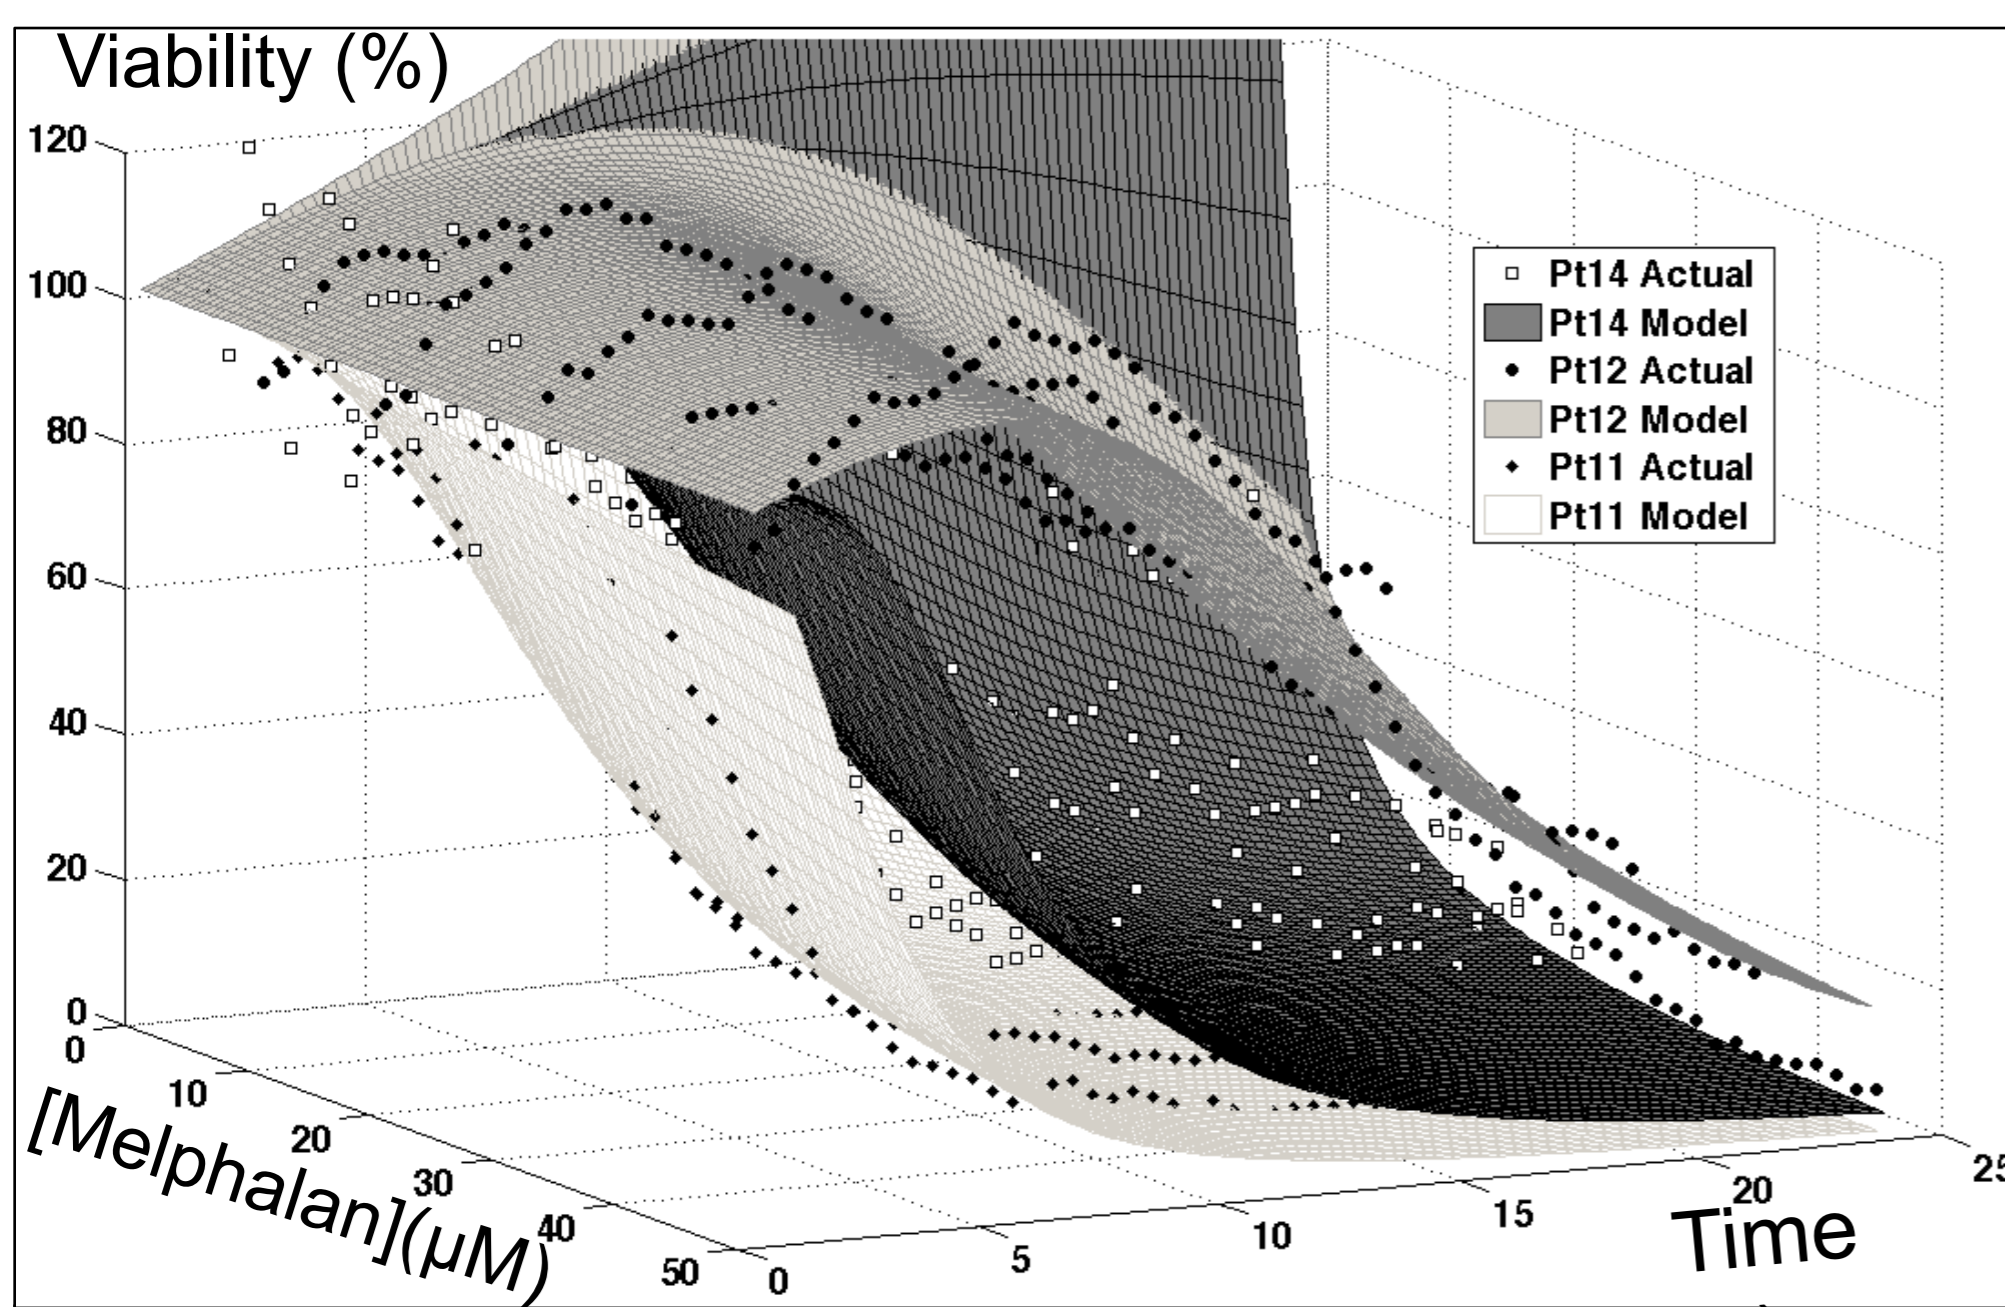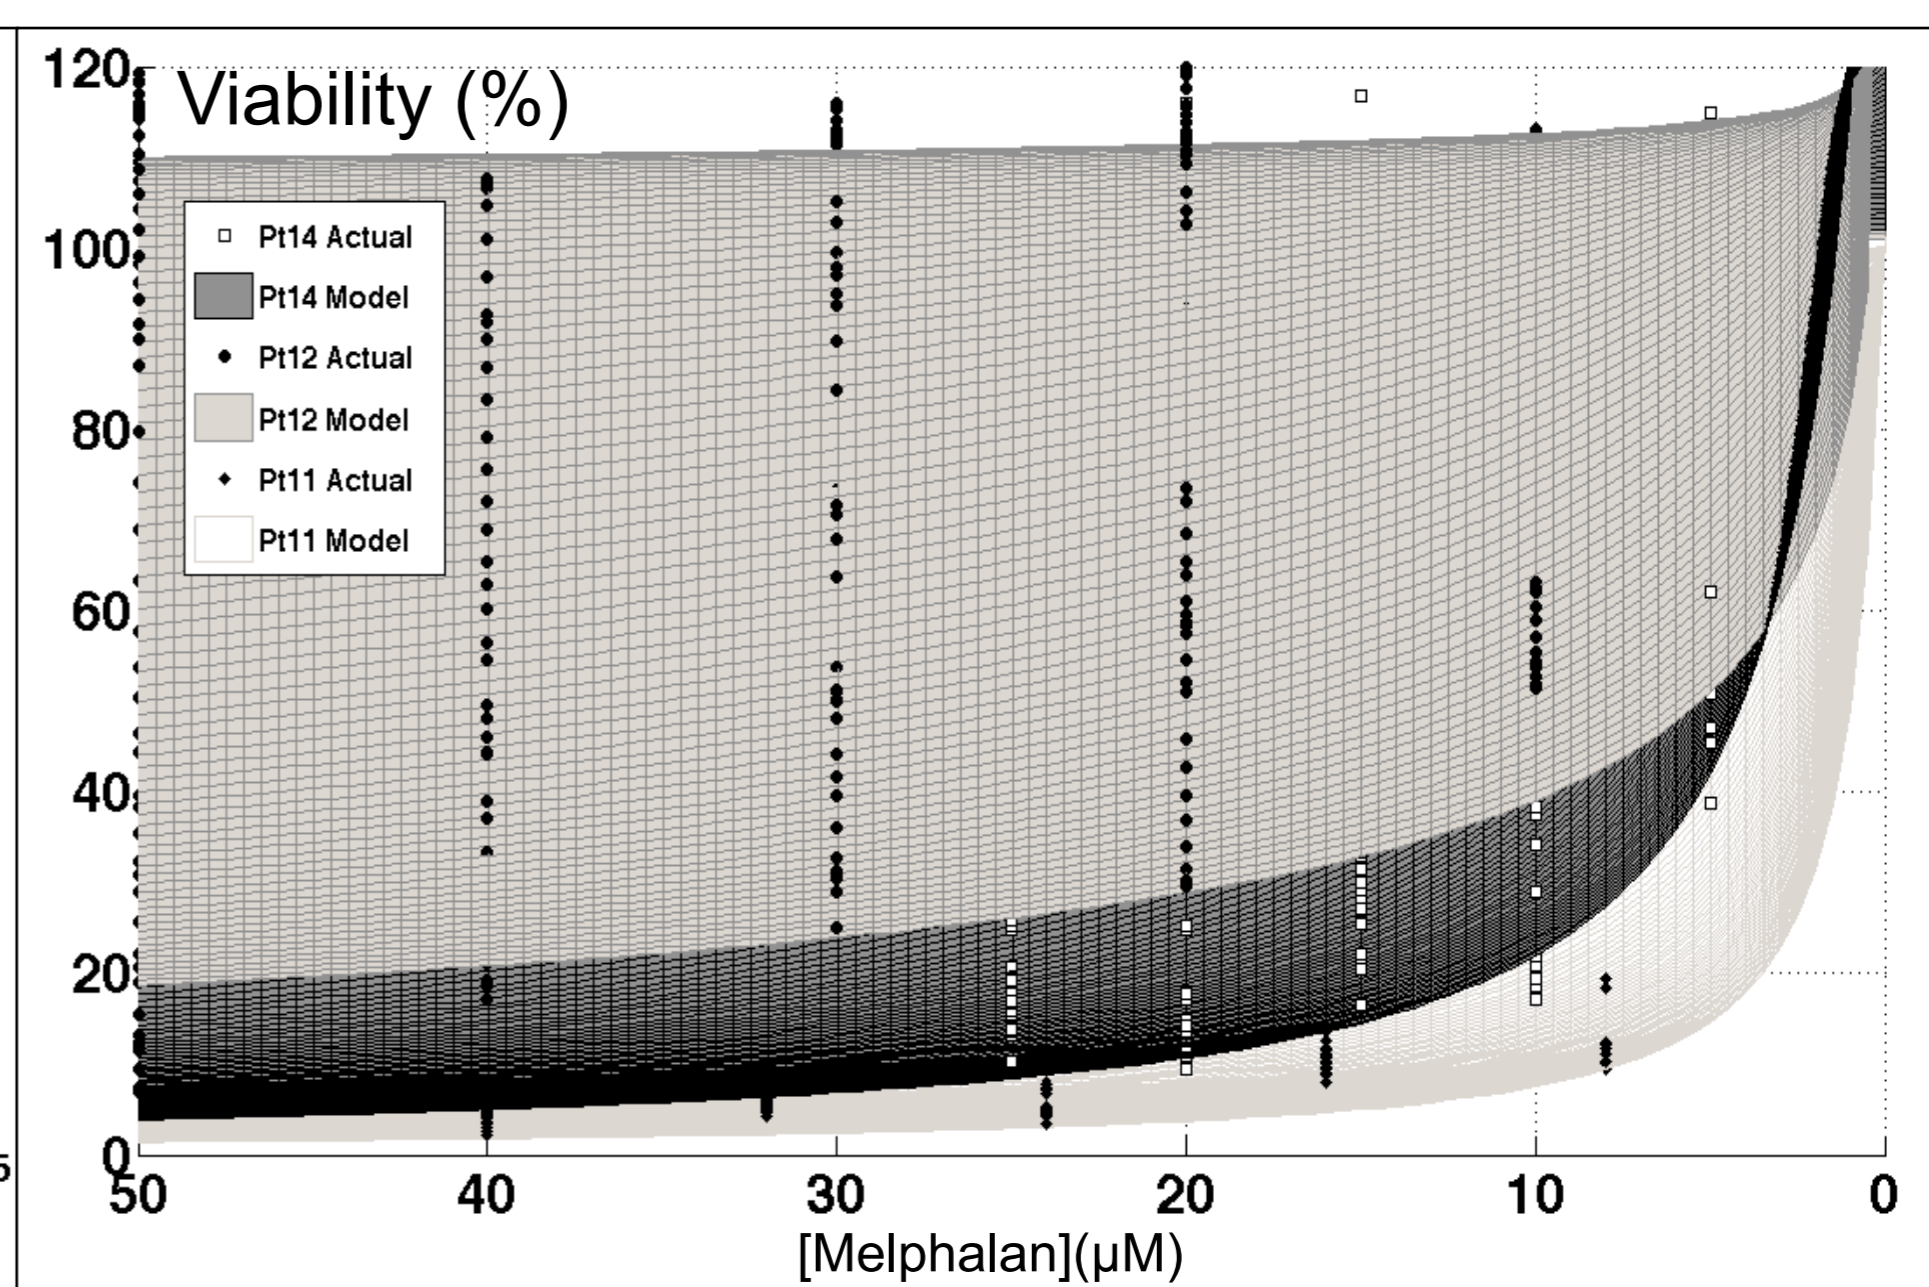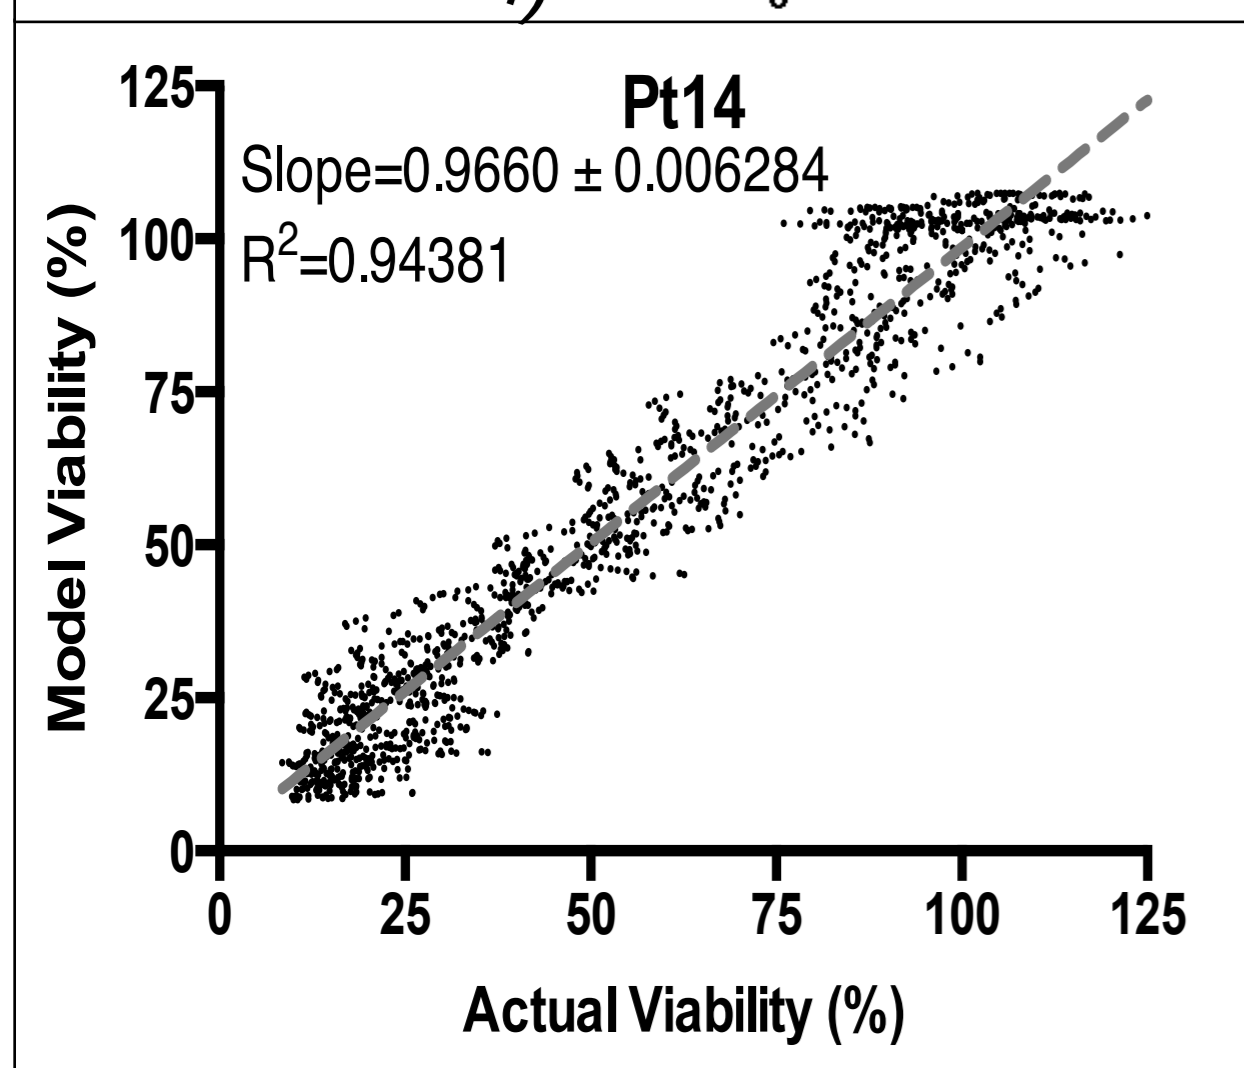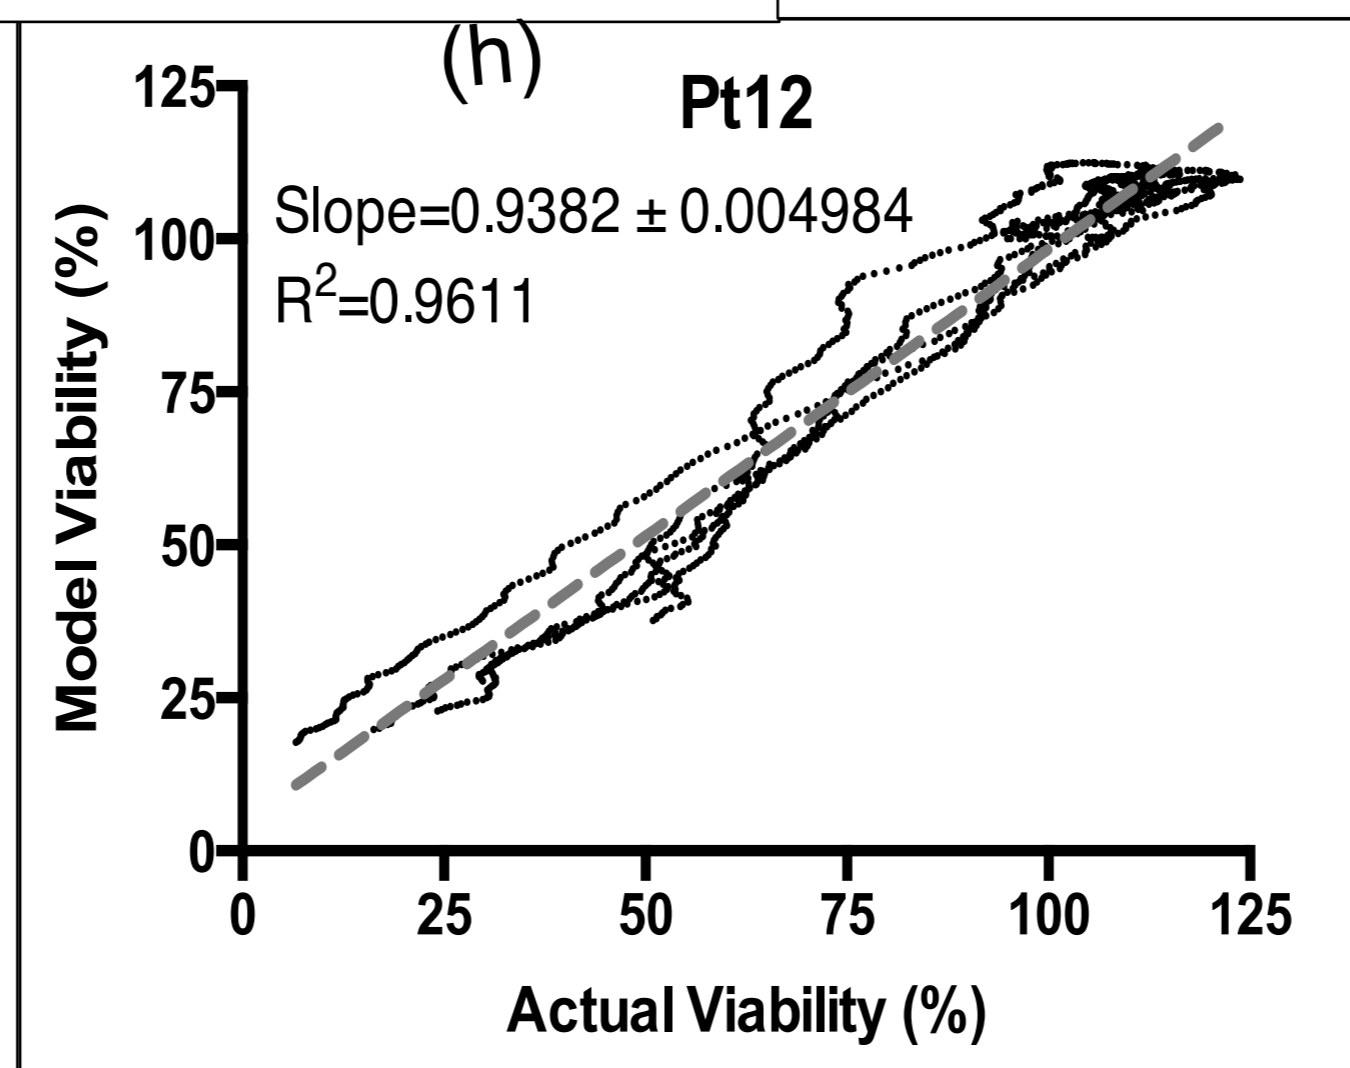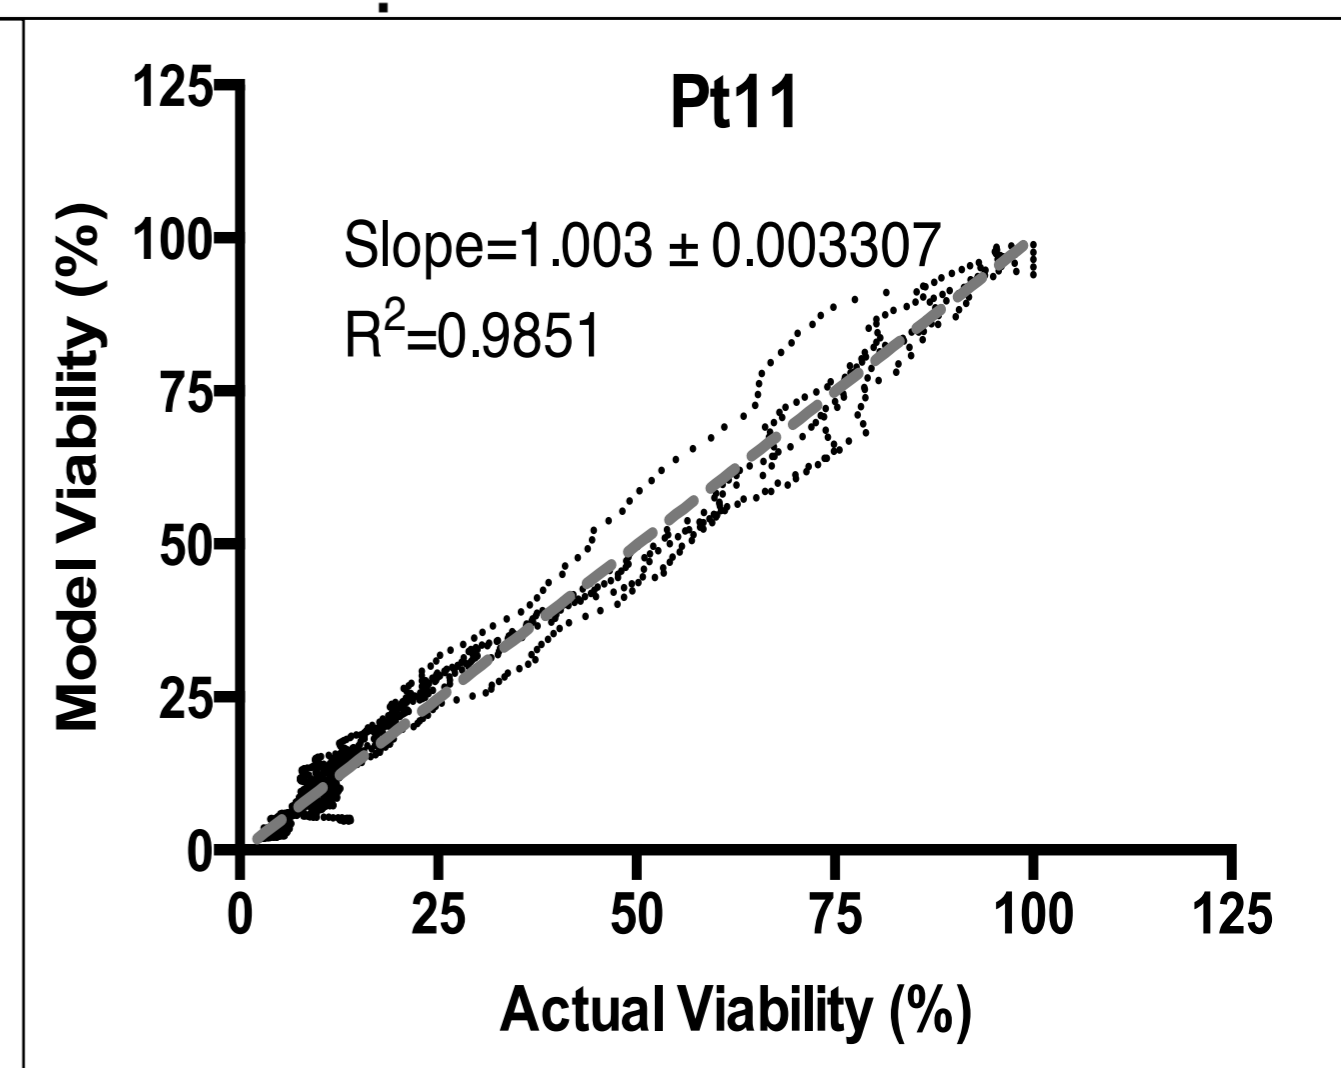

Supplement: NIHMS540327-supplement-5.pdf [file NIHMS540327-supplement-5.pdf]

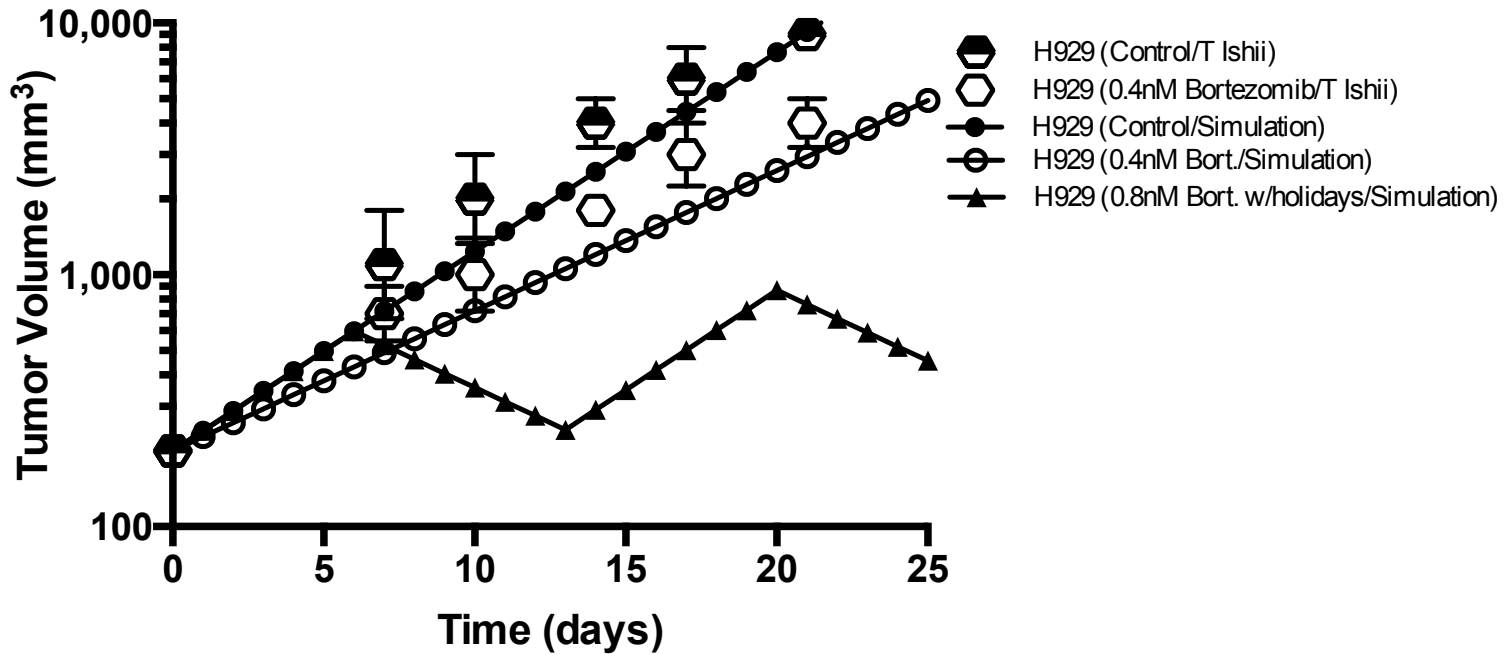

Supplement: NIHMS540327-supplement-6.pdf [file NIHMS540327-supplement-6.pdf]

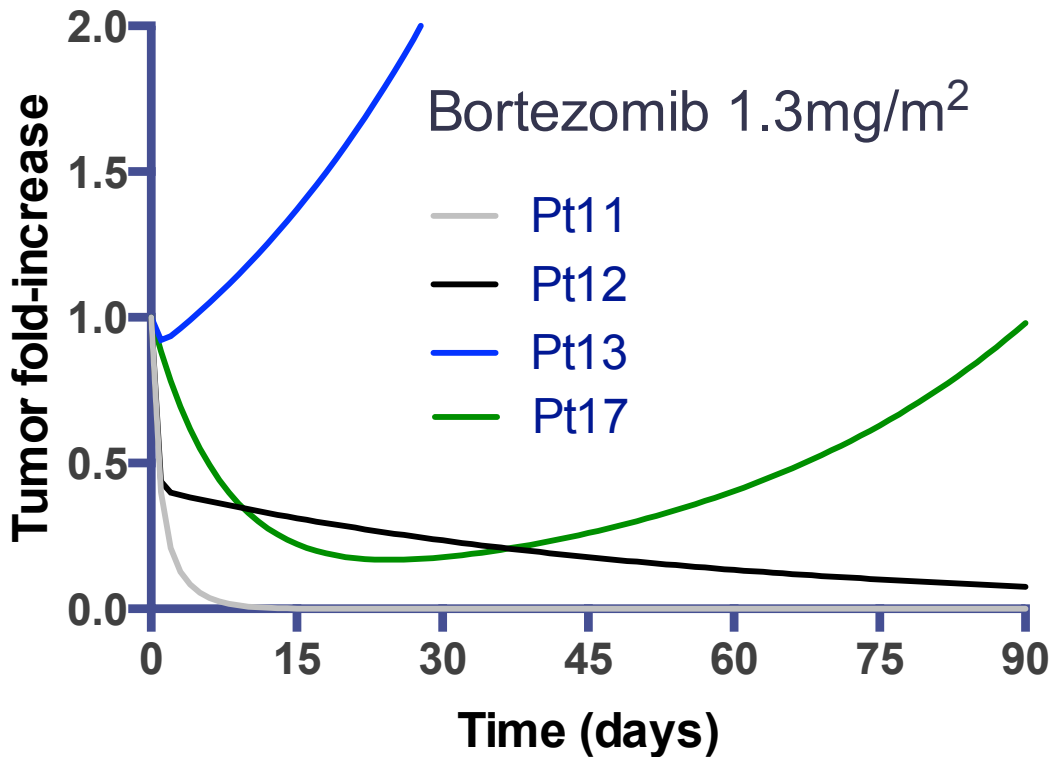

Supplement: NIHMS540327-supplement-7.pdf [file NIHMS540327-supplement-7.pdf]
